# Supplementary material for: Hierarchical Component Model (HCM) of Career Success and the Moderating Effect of Gender, from the Perspective of University Alumni: Multigroup Analysis and Empirical Evidence from Quevedo, Ecuador
Source: MDPI journal article supplement (doi:10.3390/su15010540), 2022-12-28

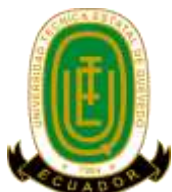

# UNIVERSIDAD TÉCNICA ESTATAL DE QUEVEDO

DIRECCIÓN DE INVESTIGACIÓN CIENCIA Y TECNOLOGÍA

Campus "Manuel Haz Álvarez", Quevedo – Los Ríos – Ecuador

www.uteq.edu.ec Telf.: 053702220 ext. 8039

"Avanzando por un sendero tecnológico con calidad y experiencia"

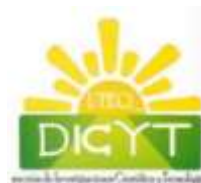

CERT- ÉTICA-003-DICYT-2022

## DIRECCIÓN DE INVESTIGACIÓN – CÓDIGO DE ÉTICA DE LA INVESTIGACIÓN Y EL APRENDIZAJE DE LA UNIVERSIDAD TÉCNICA ESTATAL DE QUEVEDO

### CERTIFICA

Que el proyecto de investigación ***"Predicción y valoración del éxito profesional de los graduados universitarios"***, fue receptado y aprobado dentro del marco de la séptima convocatoria a Fondos competitivos FOCICYT el 30 de abril del año 2018 cuyo autor principal es el Ing. **Roberto Pico Saltos**, profesor titular de la Facultad de Ciencias de la Ingeniería, fue aprobado por parte del *Comité de Investigación y Ética* de la Universidad Técnica ESTATAL de Quevedo, considerando la pertinencia de la investigación, el rigor metodológico, su calidad científica, la coherencia y el cumplimiento de las normas científicas, técnicas y éticas, nacionales e internacionales que rigen este tipo de investigaciones.

Dentro del marco del proyecto se tiene previsto la publicación de artículos científicos con consentimiento informado de los estudiantes universitarios encuestados, producto de este proceso investigativo se cuenta con el artículo científico titulado ***"Modelo de componentes jerárquicos (MCH) del éxito profesional y el efecto moderador del género, desde la perspectiva de los ex alumnos universitarios: análisis multigrupo y evidencia empírica de Quevedo, Ecuador"***, cuyo autor principal es la Ing. **Roberto Pico Saltos**.

La investigación efectuada no afecta organismos vivos como seres humanos en atención a lo dispuesto por el Reglamento para la Aprobación y Seguimiento de los Comités de Ética de Investigación en Seres Humanos (CEISH), publicado en el Suplemento del Registro Oficial N.º 279, el 1 de julio de 2014. Sobre el posible impacto en el medio ambiente, el comité conceptúa que, por la naturaleza de la investigación, ésta no tiene efectos negativos sobre el medio ambiente.

El consentimiento informado elaborado para este trabajo de investigación incluye los aspectos requeridos para proveer la información necesaria a las personas que se incluyan en el estudio y el investigador principal debe garantizar la obtención del documento firmado por cada uno de los participantes en el estudio.

Con base en lo expresado anteriormente, el *Comité de Investigación y Ética* conceptúa que la investigación reportada en el artículo cumple con todos los requisitos de calidad exigidos y en consecuencia otorga su aprobación.

Se expide la presente certificación el 20 de julio del 2022.

Dr. Carlos Edison Zambrano  
DIRECTOR DE INVESTIGACIÓN

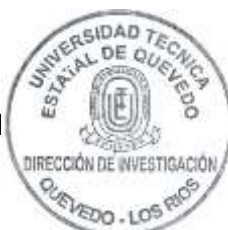

# UNIVERSIDAD TÉCNICA ESTATAL DE QUEVEDO

DIRECCIÓN DE INVESTIGACIÓN CIENCIA Y TECNOLOGÍA

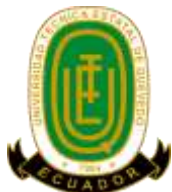

Campus "Manuel Haz Álvarez", Quevedo – Los Ríos – Ecuador

[www.uteq.edu.ec](http://www.uteq.edu.ec) **Telf.:** 053702220 **ext.** 8039

"Avanzando por un sendero tecnológico con calidad y experiencia"

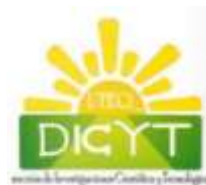

Supplement: s1 [file s1 › Table S2.pdf]
