# Supplementary material for: Hierarchical Component Model (HCM) of Career Success and the Moderating Effect of Gender, from the Perspective of University Alumni: Multigroup Analysis and Empirical Evidence from Quevedo, Ecuador
Source: MDPI journal article supplement (doi:10.3390/su15010540), 2022-12-28
Supplement: s1 [file s1 › Table S4.pdf]

**Table S4:** KMO and Bartlett’s Test for Group 2 (Subjective Career Success).

|                                                 |                    |          |
|-------------------------------------------------|--------------------|----------|
| Kaiser-Meyer-Olkin Measure of Sampling Adequacy |                    | 0.922    |
| Bartlett’s Test of Sphericity                   | Approx. Chi-Square | 4159.009 |
|                                                 | df                 | 190      |
|                                                 | Sig.               | 0.000    |
