# Supplementary material for: Hierarchical Component Model (HCM) of Career Success and the Moderating Effect of Gender, from the Perspective of University Alumni: Multigroup Analysis and Empirical Evidence from Quevedo, Ecuador
Source: MDPI journal article supplement (doi:10.3390/su15010540), 2022-12-28
Supplement: s1 [file s1 › Table S5.pdf]

**Table S5:** Dimensions and factor loadings for Group 1 (Objective Career Success).

|       | Component    |              |              |
|-------|--------------|--------------|--------------|
|       | 1            | 2            | 3            |
| EJP_1 | <b>0.805</b> |              |              |
| EJP_2 | <b>0.750</b> | 0.276        | 0.158        |
| EJP_3 | <b>0.745</b> | 0.202        |              |
| LC_1  | <b>0.379</b> | 0.783        |              |
| LC_2  |              | <b>0.728</b> | -0.100       |
| LC_3  | 0.189        | <b>0.714</b> | 0.304        |
| LC_4  | -0.329       | <b>0.362</b> |              |
| HSD_1 |              |              | <b>0.776</b> |
| HSD_2 | 0.172        | 0.157        | <b>0.723</b> |
| HSD_3 | 0.138        | 0.304        | <b>0.325</b> |

Extraction Method: Principal Component Analysis  
Rotation Method: Varimax with Kaiser Normalization  
a. Rotation converged in 4 iterations.
