# Supplementary material for: Hierarchical Component Model (HCM) of Career Success and the Moderating Effect of Gender, from the Perspective of University Alumni: Multigroup Analysis and Empirical Evidence from Quevedo, Ecuador
Source: MDPI journal article supplement (doi:10.3390/su15010540), 2022-12-28
Supplement: s1 [file s1 › Table S6.pdf]

**Table S6:** Dimensions and factor loadings for Group 2 (Subjective Career Success).

|        | Component    |              |              |
|--------|--------------|--------------|--------------|
|        | 1            | 2            | 3            |
| ILCS_1 | <b>0.731</b> | 0.207        | 0.100        |
| ILCS_2 | <b>0.675</b> | 0.141        | 0.255        |
| ILCS_3 | <b>0.674</b> | 0.172        | 0.224        |
| ILCS_4 | <b>0.671</b> | 0.217        | 0.212        |
| ILCS_5 | <b>0.656</b> |              | 0.250        |
| ILCS_6 | <b>0.581</b> | 0.122        | 0.201        |
| ILCS_7 | <b>0.574</b> |              | 0.250        |
| ILCS_8 | <b>0.563</b> | 0.309        |              |
| ILCS_9 | <b>0.395</b> | 0.288        | 0.247        |
| SW_1   | 0.323        | <b>0.781</b> |              |
| SW_2   | 0.137        | <b>0.764</b> | 0.309        |
| SW_3   | 0.353        | <b>0.752</b> |              |
| SW_4   |              | <b>0.724</b> | 0.357        |
| SW_5   | 0.120        | <b>0.681</b> | 0.474        |
| SSF_1  | 0.230        | 0.403        | <b>0.694</b> |
| SSF_2  | 0.128        | 0.416        | <b>0.681</b> |
| SSF_3  | 0.325        | 0.324        | <b>0.633</b> |
| SSF_4  | 0.288        |              | <b>0.616</b> |
| SSF_5  | 0.419        | 0.314        | <b>0.492</b> |
| SSF_6  | 0.299        | 0.176        | <b>0.342</b> |

Extraction Method: Principal Component Analysis

Rotation Method: Varimax with Kaiser Normalization

a. Rotation converged in 8 iterations.
