# Supplementary material for: Hierarchical Component Model (HCM) of Career Success and the Moderating Effect of Gender, from the Perspective of University Alumni: Multigroup Analysis and Empirical Evidence from Quevedo, Ecuador
Source: MDPI journal article supplement (doi:10.3390/su15010540), 2022-12-28
Supplement: s1 [file s1 › Table S7.pdf]

**Table S7:** Dimensions of Objective Career Success.

|       |        |       |        |
|-------|--------|-------|--------|
| EJP_1 | 0.805  |       |        |
| EJP_2 | 0.750  | 0.276 | 0.158  |
| EJP_3 | 0.745  | 0.202 |        |
| LC_1  | 0.379  | 0.783 |        |
| LC_2  |        | 0.728 | -0.100 |
| LC_3  | 0.189  | 0.714 | 0.304  |
| LC_4  | -0.329 | 0.362 |        |
| HSD_1 |        |       | 0.776  |
| HSD_2 | 0.172  | 0.157 | 0.723  |
| HSD_3 | 0.138  | 0.304 | -0.325 |
