# Supplementary material for: Hierarchical Component Model (HCM) of Career Success and the Moderating Effect of Gender, from the Perspective of University Alumni: Multigroup Analysis and Empirical Evidence from Quevedo, Ecuador
Source: MDPI journal article supplement (doi:10.3390/su15010540), 2022-12-28
Supplement: s1 [file s1 › Table S8.pdf]

**Table S8:** Dimensions of Subjective Career Success.

|        |       |       |       |
|--------|-------|-------|-------|
| ILCS_1 | 0.731 | 0.207 | 0.100 |
| ILCS_2 | 0.675 | 0.141 | 0.255 |
| ILCS_3 | 0.674 | 0.172 | 0.224 |
| ILCS_4 | 0.671 | 0.217 | 0.212 |
| ILCS_5 | 0.656 |       | 0.250 |
| ILCS_6 | 0.581 | 0.122 | 0.201 |
| ILCS_7 | 0.574 |       | 0.250 |
| ILCS_8 | 0.563 | 0.309 |       |
| ILCS_9 | 0.395 | 0.288 | 0.247 |
| SW_1   | 0.323 | 0.781 |       |
| SW_2   | 0.137 | 0.764 | 0.309 |
| SW_3   | 0.353 | 0.752 |       |
| SW_4   |       | 0.724 | 0.357 |
| SW_5   | 0.120 | 0.681 | 0.474 |
| SSF_1  | 0.230 | 0.403 | 0.694 |
| SSF_2  | 0.128 | 0.416 | 0.681 |
| SSF_3  | 0.325 | 0.324 | 0.633 |
| SSF_4  | 0.288 |       | 0.616 |
| SSF_5  | 0.419 | 0.314 | 0.492 |
| SSF_6  | 0.299 | 0.176 | 0.342 |
