# Supplementary material for: Hierarchical Component Model (HCM) of Career Success and the Moderating Effect of Gender, from the Perspective of University Alumni: Multigroup Analysis and Empirical Evidence from Quevedo, Ecuador
Source: MDPI journal article supplement (doi:10.3390/su15010540), 2022-12-28
Supplement: s1 [file s1 › Table S9.pdf]

**Table S9:** Measurement model invariance assessment based on MICOM approach.

| Measurement model              | CI <sup>a</sup> | Compositional Invariance Assessment |       |                  | Full Measurement Model Invariance Assessment |                     |       |                 |                 |                     |       |                 |                  |
|--------------------------------|-----------------|-------------------------------------|-------|------------------|----------------------------------------------|---------------------|-------|-----------------|-----------------|---------------------|-------|-----------------|------------------|
|                                |                 | OC <sup>b</sup>                     | 0.05  | PMI <sup>c</sup> | MD <sup>d</sup>                              | Confidence interval |       | EM <sup>e</sup> | VD <sup>f</sup> | Confidence interval |       | EV <sup>g</sup> | FMI <sup>h</sup> |
|                                |                 |                                     |       |                  |                                              | 2.5%                | 97.5% |                 |                 |                     |       |                 |                  |
| 1_EDUC JOB PERF                | Yes             | 0.999                               | 0.997 | Yes              | 0.292                                        | -0.182              | 0.187 | No              | -0.179          | -0.344              | 0.347 | Yes             | No               |
| 2_LEARN COMP                   | Yes             | 1.000                               | 0.999 | Yes              | 0.242                                        | -0.184              | 0.184 | No              | -0.131          | -0.173              | 0.178 | Yes             | No               |
| 3_HARD SKILLS<br>DEVEL         | Yes             | 0.997                               | 0.949 | Yes              | 0.247                                        | -0.186              | 0.184 | No              | 0.117           | -0.257              | 0.267 | Yes             | No               |
| 4_INT LEAD COM<br>SKILLS       | Yes             | 0.999                               | 0.998 | Yes              | 0.244                                        | -0.188              | 0.192 | No              | -0.165          | -0.278              | 0.284 | Yes             | No               |
| 5_SUCCESS WORK                 | Yes             | 1.000                               | 0.999 | Yes              | 0.034                                        | -0.189              | 0.186 | Yes             | 0.010           | -0.301              | 0.305 | Yes             | Yes              |
| 6_SATIS SELF FULF              | Yes             | 1.000                               | 0.999 | Yes              | 0.060                                        | -0.186              | 0.187 | Yes             | -0.016          | -0.317              | 0.321 | Yes             | Yes              |
| 7_OBJECTIVE<br>CAREER SUCCESS  | Yes             | 1.000                               | 0.992 | Yes              | 0.343                                        | -0.185              | 0.185 | No              | -0.264          | -0.266              | 0.271 | Yes             | No               |
| 8_SUBJECTIVE<br>CAREER SUCCESS | Yes             | 1.000                               | 0.999 | Yes              | 0.117                                        | -0.187              | 0.190 | Yes             | -0.092          | -0.297              | 0.304 | Yes             | Yes              |
| 9_CAREER SUCCESS               | Yes             | 1.000                               | 0.998 | Yes              | 0.205                                        | -0.187              | 0.189 | No              | -0.142          | -0.281              | 0.290 | Yes             | No               |

<sup>a</sup> Compositional Invariance

<sup>b</sup> Original Correlation

<sup>c</sup> Compositional Invariance (Partial Measurement Invariance)

<sup>d</sup> Mean difference (Female - Male)

<sup>e</sup> Equal means

<sup>f</sup> Variance difference (Female - Male)

<sup>g</sup> Equal Variance

<sup>h</sup> Full measurement invariance
